# Supplementary material
Source: Royal Society of Chemistry journal article supplement (doi:10.1039/d5tb02688a)
Supplement: d5tb02688a1.pdf [file d5tb02688a1.pdf]

## Supporting Information

# Graphene-Based Porous Hydrogels with Tunable Piezoresistive Response for Wearable Strain Sensing

Nishadi M. Bandara,<sup>a</sup> Khandaker Umaiya,<sup>a</sup> Michael J. Joyce,<sup>a</sup> Cesar E. Gouveia,<sup>b</sup> Douglas H.

Adamson<sup>a, b,\*</sup>

<sup>a</sup>Department of Chemistry, University of Connecticut, Storrs, Connecticut, USA

<sup>b</sup>Polymer Program, Institute of Materials Science, University of Connecticut, Storrs,

Connecticut, USA

E-mail: [douglas.adamson@uconn.edu](mailto:douglas.adamson@uconn.edu)

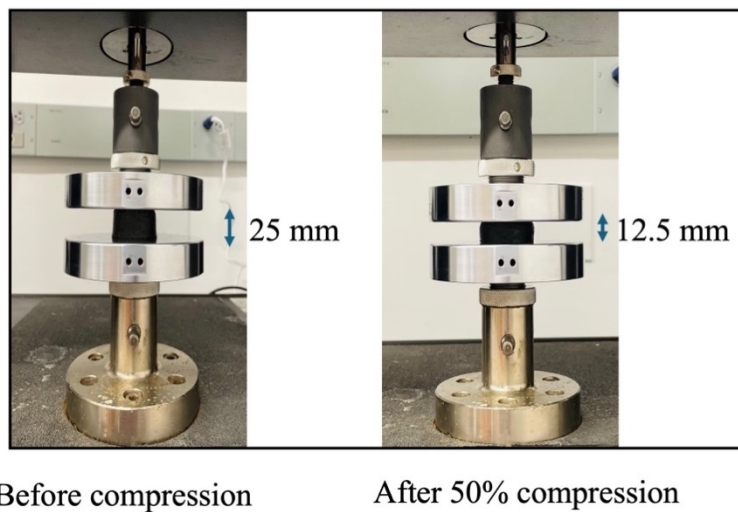

**Figure S1.** Digital photographs of the hydrogel in the process of compression.

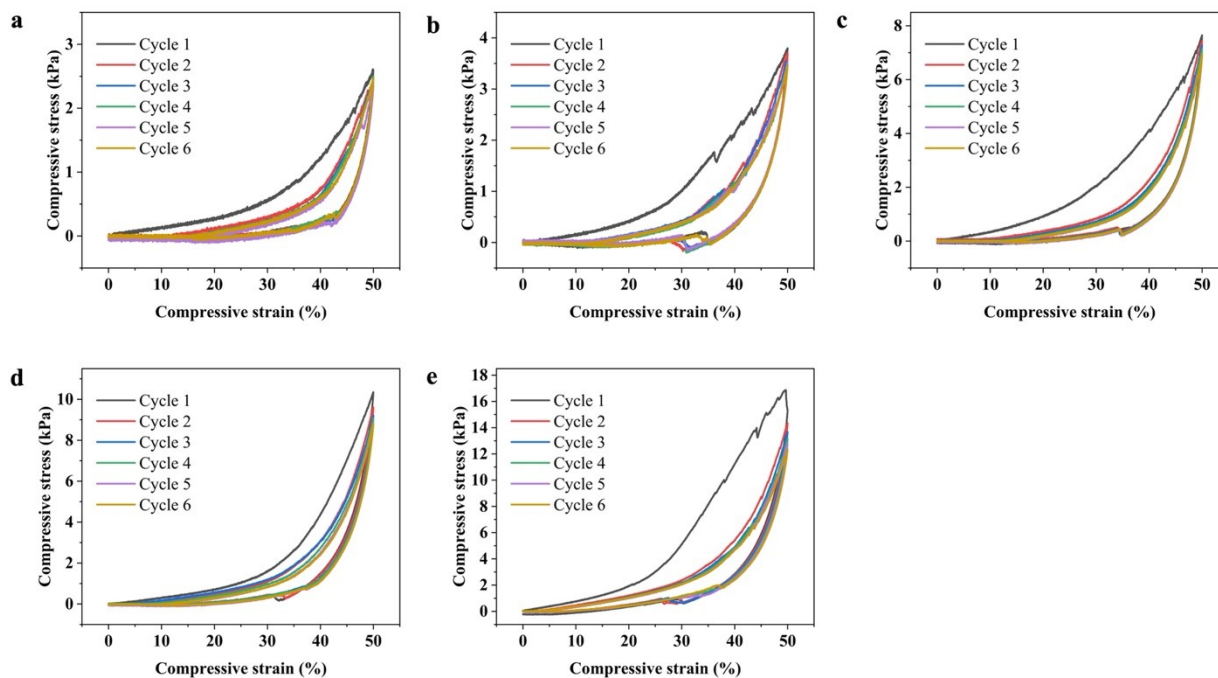

**Figure S2.** Multi 50% compress-release cycles of hydrogel samples with graphite weight percentages, a) 1.93 b) 2.34 c) 2.77 d) 3.05 and e) 3.32 respectively

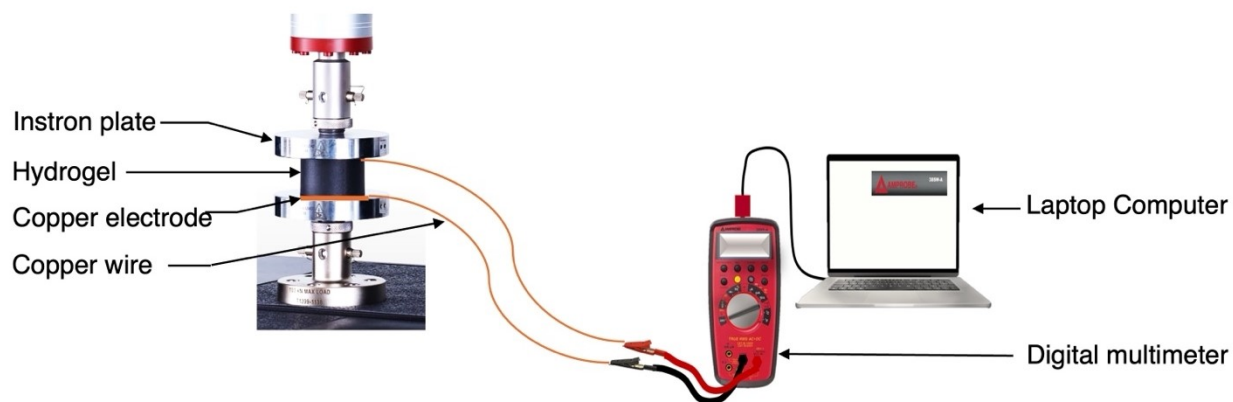

**Figure S3.** Schematic illustration of the experimental set-up to characterize the piezoresistive properties of the hydrogel.

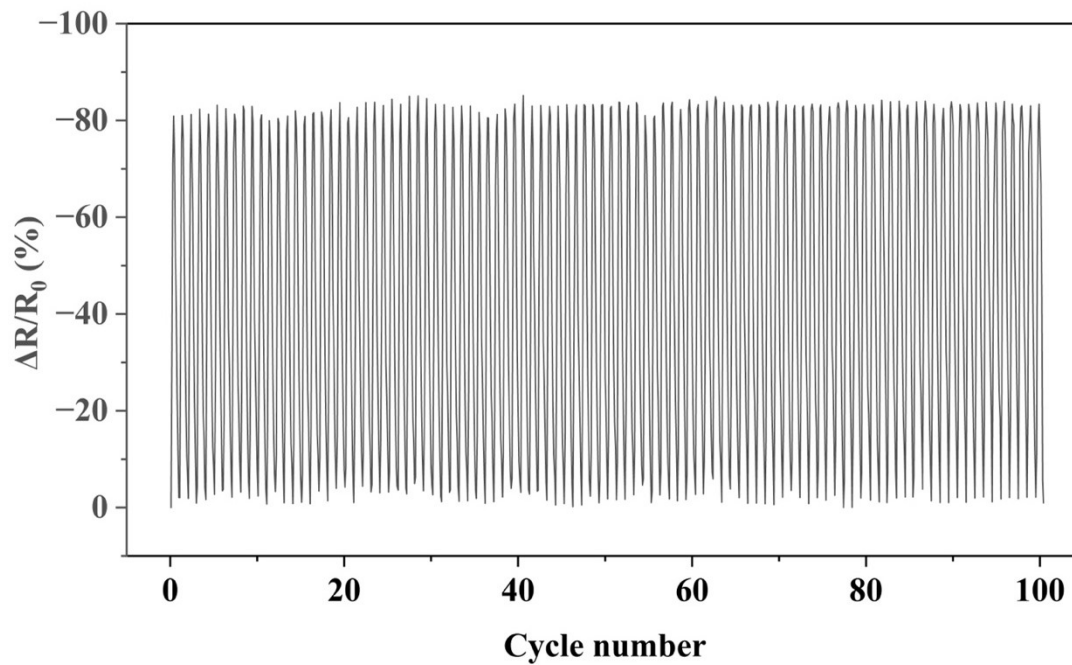

**Figure S4.** Change of electrical resistance of a hydrogel sensor over 100 loading/unloading cycles.

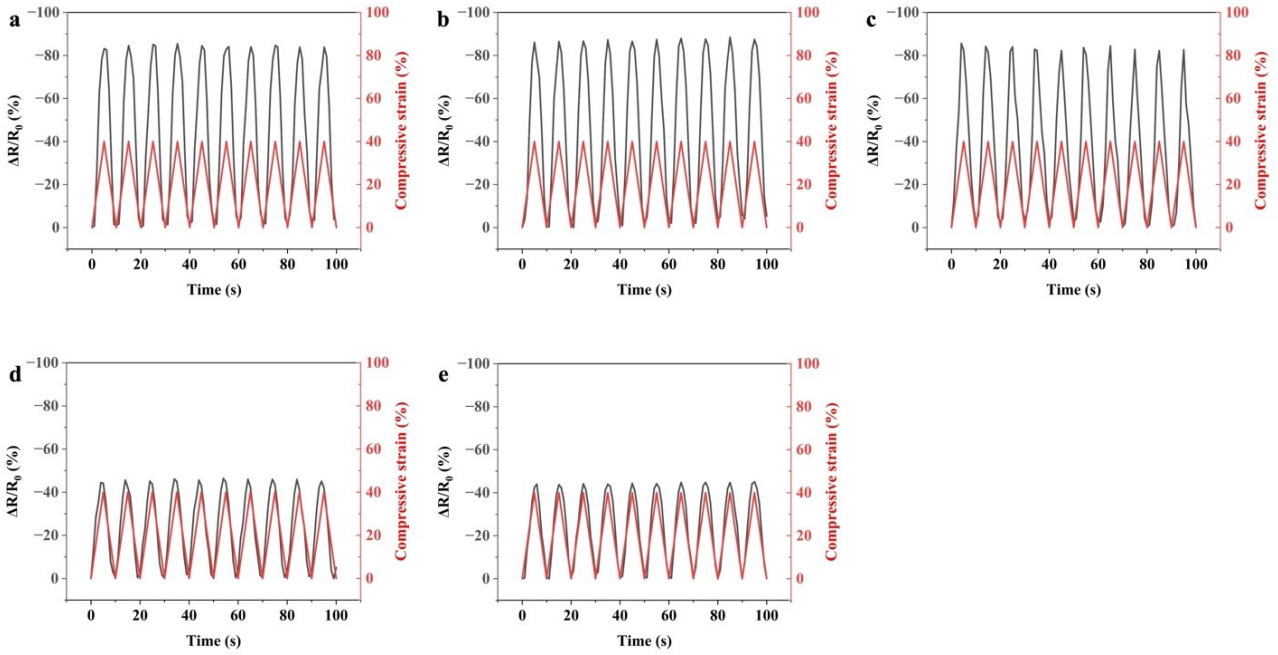

**Figure S5.** Change of electrical resistance for hydrogel sensors made with monomer: cross linker molar ratios, a) 60:1 b) 30:1 c) 20:1 d) 15:1 and e) 7.5:1 undergoing 40% compressions and relaxations at regular time intervals.

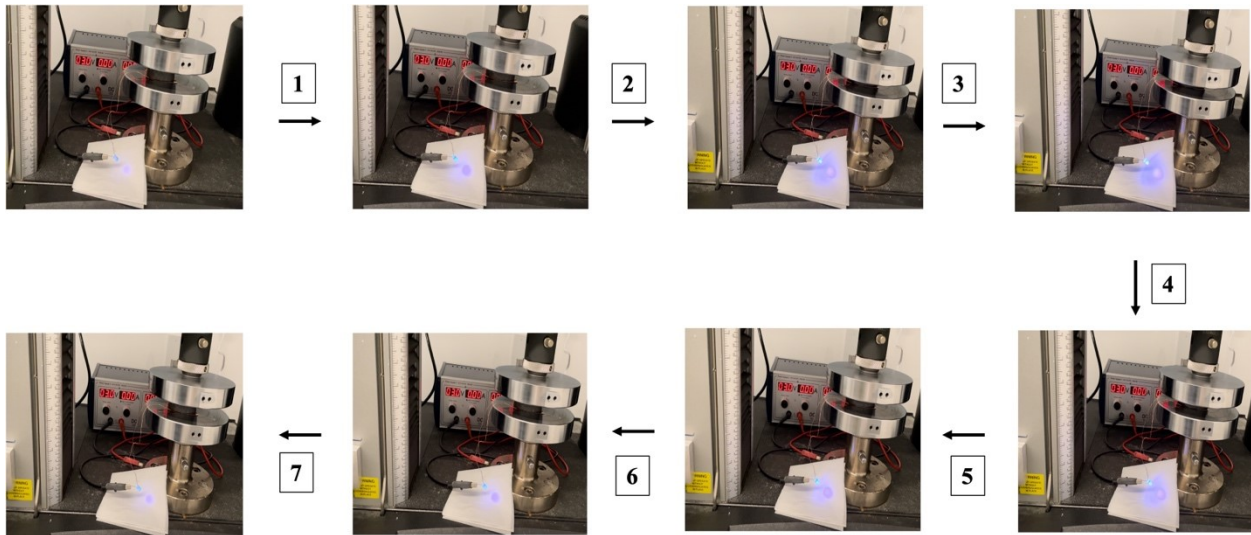

**Figure S6.** Stages 1-3 represent gradual increase of brightness of blue LED upon compression of the hydrogel, stages 4-7 represent gradual decrease of brightness of blue LED upon relaxation.

**Table S1.** Comparison of performances of PHMA/Graphene hydrogel with literature-reported hydrogel sensors

| Sample                                      | Gauge factor | strain at which gauge factor was calculated | Mode of deformation |
|---------------------------------------------|--------------|---------------------------------------------|---------------------|
| PVA/PVP/CNCs hybrid hydrogel <sup>[1]</sup> | 0.48         | 0–200%                                      | Tension             |
| CPVA/GO-PDA hydrogel <sup>[2]</sup>         | 0.33         | 0–75%                                       | Tension             |
|                                             | 0.90         | 75–150%                                     |                     |
|                                             | 5.52         | 150–350%                                    |                     |
| Poly(AM-co-AA)/CS hydrogel <sup>[3]</sup>   | 6.00         | 700%                                        | Tension             |
| PVA ionic organohydrogel <sup>[4]</sup>     | 1.56         | 0–355%                                      | Tension             |
| PVA/HPS-PA hydrogel <sup>[5]</sup>          | 2.90         | 0–300%                                      | Tension             |
|                                             | 7.40         | 300–450%                                    |                     |
| SA/PAM/DAL/rGO Hydrogel <sup>[6]</sup>      | 1.67         | 100%                                        | Tension             |
|                                             | 7.97         | 500%                                        |                     |
| PVA/PSBMA ionic hydrogel <sup>[7]</sup>     | 0.80         | 0-50%                                       | Tension             |
|                                             | 1.50         | 50-300%                                     |                     |
| Graphene monolith <sup>[8]</sup>            | 1.2          | 50%                                         | Compression         |
| N-CNTs/Ag sponge <sup>[9]</sup>             | 1.4          | 20%                                         | Compression         |
| Graphene monolith <sup>[10]</sup>           | 0.58         | 30%                                         | Compression         |
| Graphene/CNT aerogel <sup>[11]</sup>        | 1.25         | 60%                                         | Compression         |
| PPY hydrogel <sup>[12]</sup>                | 0.05         | 50%                                         | Compression         |
| <b>PHMA/Graphene hydrogel in this work</b>  | <b>13</b>    | <b>5%</b>                                   | <b>Compression</b>  |

### Reference

- [1] Y.-J. Liu, W.-T. Cao, M.-G. Ma, P. Wan, *ACS Appl. Mater. Interfaces* **2017**, *9*, 25559.
- [2] Y. Yu, X. Zhao, L. Ye, *Compos. Struct.* **2023**, *309*, 116768.
- [3] Y. Liang, L. Ye, X. Sun, Q. Lv, H. Liang, *ACS Appl. Mater. Interfaces* **2020**, *12*, 1577.
- [4] X.-J. Zha, S.-T. Zhang, J.-H. Pu, X. Zhao, K. Ke, R.-Y. Bao, L. Bai, Z.-Y. Liu, M.-B. Yang, W. Yang, *ACS Appl. Mater. Interfaces* **2020**, *12*, 23514.
- [5] H. Zhou, Z. Wang, W. Zhao, X. Tong, X. Jin, X. Zhang, Y. Yu, H. Liu, Y. Ma, S. Li, W. Chen, *Chem. Eng. J.* **2021**, *403*, 126307.
- [6] Y. Qian, Y. Zhou, M. Lu, X. Guo, D. Yang, H. Lou, X. Qiu, C. F. Guo, *Small Methods* **2021**, *5*, 2001311.
- [7] Z. Wang, J. Chen, L. Wang, G. Gao, Y. Zhou, R. Wang, T. Xu, J. Yin, J. Fu, *J. Mater. Chem. B* **2019**, *7*, 24.
- [8] L. Qiu, J. Z. Liu, S. L. Y. Chang, Y. Wu, D. Li, *Nat. Commun.* **2012**, *3*, 1241.
- [9] S. Zhao, Y. Gao, G. Zhang, L. Deng, J. Li, R. Sun, C.-P. Wong, *Carbon* **2015**, *86*, 225.
- [10] Y. Zhao, J. Liu, Y. Hu, H. Cheng, C. Hu, C. Jiang, L. Jiang, A. Cao, L. Qu, *Adv. Mater.* **2013**, *25*, 591.
- [11] P. Lv, K. Yu, X. Tan, R. Zheng, Y. Ni, Z. Wang, C. Liu, W. Wei, *RSC Adv.* **2016**, *6*, 11256.

- [12] Y. Lu, W. He, T. Cao, H. Guo, Y. Zhang, Q. Li, Z. Shao, Y. Cui, X. Zhang, *Sci. Rep.* **2014**, *4*, 5792.
